# Supplementary material
Source: publisher site journal article supplement (https://zookeys.pensoft.net/article/94242/download/suppl/34/)
Supplement: Supplementary file

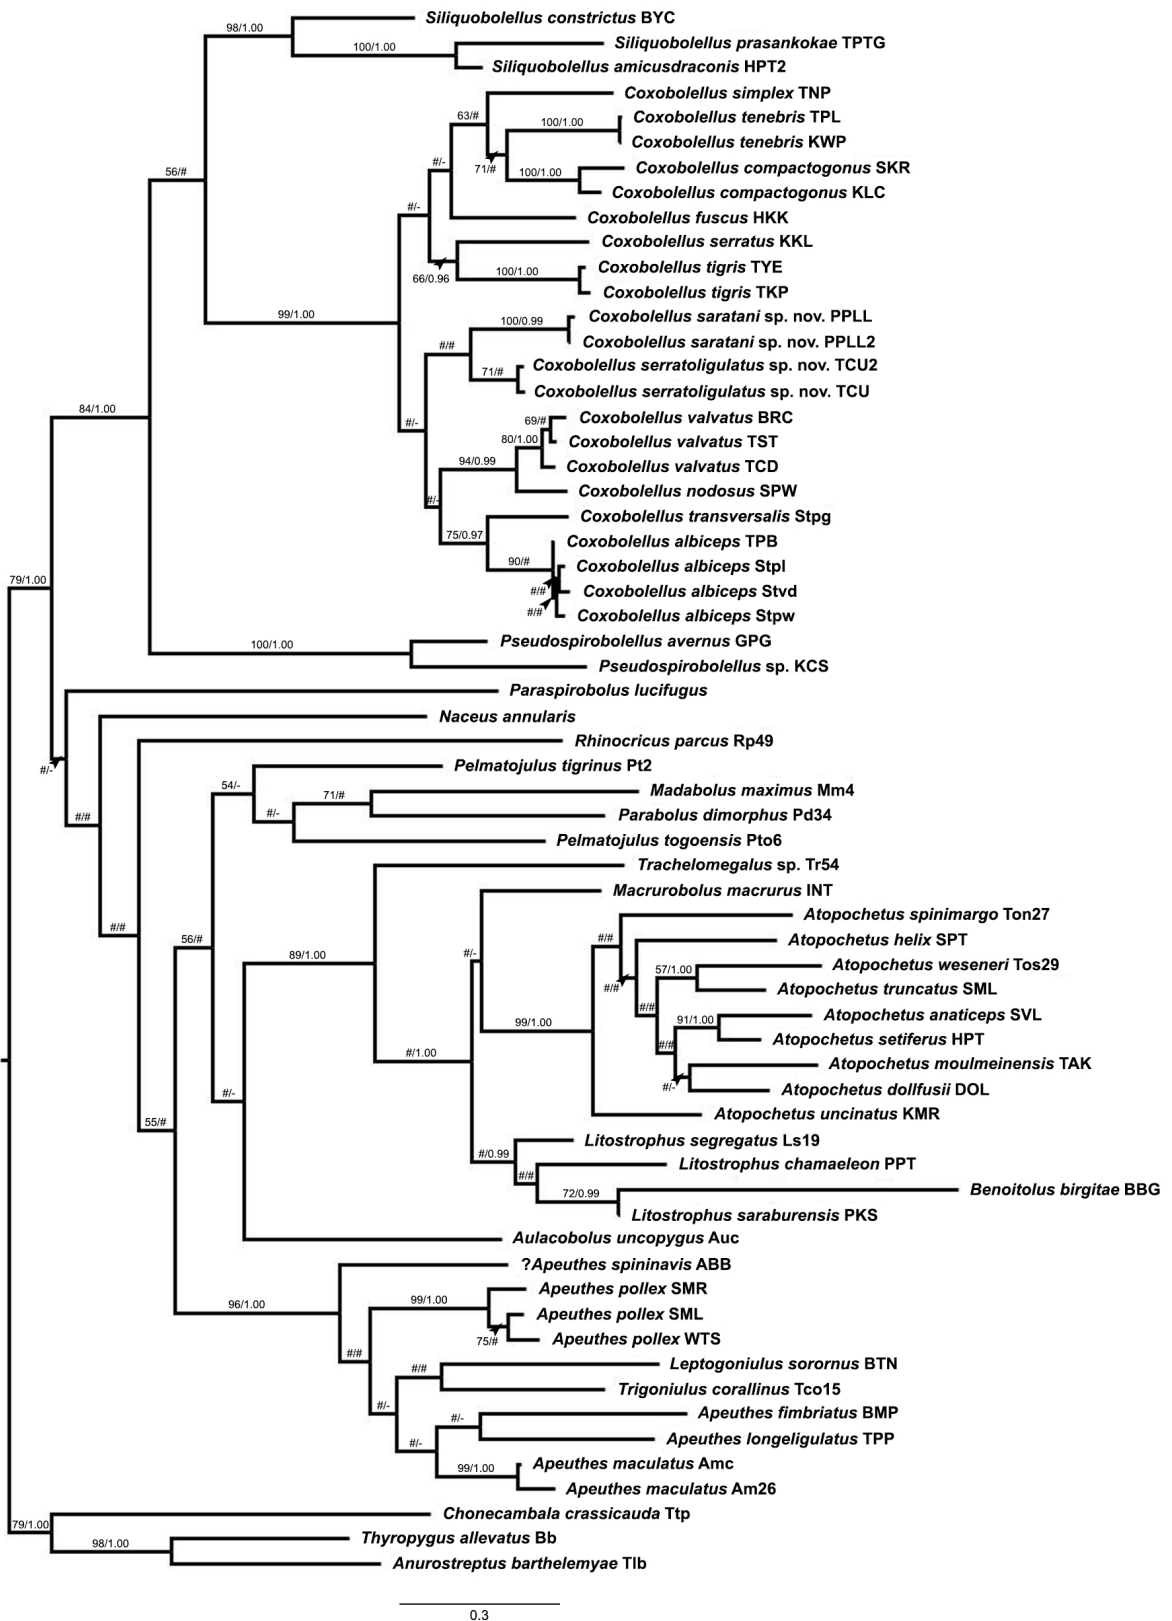

**Figure S1.** Phylogenetic relationships of *Coxobolellus* species based on maximum likelihood analysis (ML) and Bayesian inference (BI) of 660 bp of the COI alignment. Numbers at nodes indicate branch support based on bootstrapping (ML) / posterior probabilities (BI). Scale bar = 0.3 substitutions/site. # indicates branches with <50% ML bootstrap support and <0.95 Bayesian posterior probability. - indicates non-supported branches.
